# Supplementary material
Source: PubMed Central journal article supplement (PMC8763189)
Supplement: ASN.2020121753SupplementaryData.pdf [file ASN.2020121753SupplementaryData.pdf]

## Supplementary materials

### Immunosuppressive regimen of patients

For all patients, induction therapy was anti-IL2RA (20mg on day 0 and day 4) (SIMULECT<sup>®</sup>, Novartis Pharma SAS) and Methylprednisolone: 500 mg at day 0, 120 mg at day 1, then prednisone or equivalent, 20 mg/day from day 3. Maintenance immunosuppressive regimen was either based on everolimus 0.75mg bid, targeted to 3-8 ng/ml and Cyclosporin A (CsA) with target ranges 100-200 ng/ml from day 3 to month 2, 75-150 ng/mL from month 2 to month 4 and 25-50 ng/mL from months 6 to 12, either Csa with target ranges of 150–220 ng/mL from day 3 to month 2, 100–150 ng/mL from month 2 to month 12 and mycophenolic acid 1080 mg bid for one month, then 720 mg bid. Cyclosporin and everolimus whole blood concentrations were performed at day 7, day 14 and month 6 post transplantation.

## Supplemental material Table of Contents

Supplemental Table 1: References of flow cytometry material

Supplemental Figure legends

Figure S1. Flow chart of the ancillary study

Figure S2. Flow chart of MPA-treated patients of the ancillary study

Figure S3 V $\delta$ 2<sup>neg</sup>  $\gamma\delta$  T cells and CD8<sup>+</sup>  $\alpha\beta$  T cells phenotype at baseline in CMV seropositive patients

Figure S4 Phenotype of V $\delta$ 2<sup>neg</sup>  $\gamma\delta$  T cells and CMV-specific  $\alpha\beta$  T cells during in vitro culture

Figure S5 Low dose of mTORi decrease the number of V $\delta$ 2<sup>neg</sup>  $\gamma\delta$  T cells and CMV-specific  $\alpha\beta$  T cell expressing CD85j.

Figure S6 mTORi does not affect CMV-specific  $\alpha\beta$  T cell frequencies during in vitro culture

Figure S7 mTORi improvement of the T cell dysfunctional profile is maintained when combined with ciclosporin

Figure S8 Blocking anti-CD3 mAb had no effect on V $\delta$ 2<sup>neg</sup>  $\gamma\delta$  T cell viability.

Figure S9 mTORi does not affect SLP-76 and MAP kinase 38 signaling after TCR stimulation of V $\delta$ 2<sup>neg</sup>  $\gamma\delta$  T cells

Figure S10 No effect of mTORi on Akt phosphorylation after TCR stimulation of V $\delta$ 2<sup>neg</sup>  $\gamma\delta$  T cells

**Supplemental table 1. References of flow cytometry material**

|                                                   | MANUFACTURER      | CLONE           | N°CATALOG  | LAST BATCH  | DILUTION |
|---------------------------------------------------|-------------------|-----------------|------------|-------------|----------|
| <b>PER-CP CD3</b>                                 | BD biosciences    | SP34-2          | 9091596    | 552851      | 0.4      |
| <b>FITC CD16</b>                                  | BD biosciences    | 3g8             | 8255938    | 560996      |          |
| <b>BV421 CD154</b>                                | BD biosciences    | TRAP-1          | 9171764    | 566268      | 0.1      |
| <b>fixable viability stain 575V</b>               | BD biosciences    |                 | 7020921    | 565694      | 0.0002   |
| <b>BV510 CD8</b>                                  | BD biosciences    | SK-1            | 8003887    | 561617      | 0.1      |
| <b>BV786 CD27</b>                                 | BD biosciences    | L128            | 8236716    | 563328      | 0.02     |
| <b>PE pan-δ</b>                                   | Miltenyi          | REA 591         | 5190321373 | 130-113-512 | 0.02     |
| <b>PC-7 Vδ2</b>                                   | Miltenyi          | REA 711         | 5190131222 | 130-111-012 | 0.1      |
| <b>BV650 CD161</b>                                | BD biosciences    | DX12            | 7235832    | 563864      | 0.1      |
| <b>BV786 CD16</b>                                 | BD biosciences    | 3G8             | 7139586    | 563690      | 0.1      |
| <b>FITC CD85J</b>                                 | BD biosciences    | GHI/75          | 6214793    | 555942      | 0.4      |
| <b>PE VIO-615 KLRG1</b>                           | Miltenyi          | REA 261         | 5171115662 | 130-108-395 | 0.06     |
| <b>BV650 PD1</b>                                  | BD biosciences    | EH12            | 7258845    | 564104      | 0.1      |
| <b>BV711 TIM3</b>                                 | BD biosciences    | 7D3             | 8310921    | 565566      | 0.1      |
| <b>BV786 DNAM</b>                                 | BD biosciences    | DX11            | 8318701    | 742497      | 0.04     |
| <b>FITC Granulysin</b>                            | BD biosciences    | RB1             | 7089964    | 558254      | 0.04     |
| <b>APC pan-δ</b>                                  | Miltenyi          | REA591          | 5190314461 | 130-113-508 | 0.06     |
| <b>PE-CF594 CD8</b>                               | BD biosciences    | RPA-T8          | 7150677    | 562282      | 0.04     |
| <b>V450 CD3</b>                                   | BD biosciences    | UCHT1           | 8164556    | 560365      | 0.06     |
| <b>BV786 Interferon-γ</b>                         | BD biosciences    | 4S-B3           | 7187947    | 563731      | 0.04     |
| <b>PE Granzym B</b>                               | Molecular probes  | GB12            | 1735130    | MHB04       | 0.04     |
| <b>APC-H7 CD45RA</b>                              | BD biosciences    | HI 100          | 7226562    | 560674      | 0,1      |
| <b>APC Perforin</b>                               | BD biosciences    | dG9             | 7124573    | 563576      | 0,1      |
| <b>BV421 Granzym</b>                              | BD biosciences    | GB11            |            | 563389      | 0,1      |
| <b>APC CY7 CD16</b>                               | BD biosciences    | 3G8             | 7075615    | 560195      | 0,1      |
| <b>FITC CD16</b>                                  | BD biosciences    | 3g8             | 8255938    | 560996      | 0.1      |
| <b>PC7 P-S6</b>                                   | Cell signalling   | D57.2.2E        | 2          | #34411      | 0,005    |
| <b>Alexa fluor 647 P-38 MAPK</b>                  | Cell signalling   | 3D7             | 7          | #14594      | 0,02     |
| <b>PE PAKT T308</b>                               | BD biosciences    | J1-223.371      | 9192801    | 558275      | 0,1      |
| <b>FITC PERK 1/2</b>                              | BD biosciences    | 20A             | 720836     | 612592      | 0,1      |
| <b>FITC PAKT S473</b>                             | BD biosciences    | M89-61          | 9282654    | 560404      | 0.1      |
| <b>PE AKT</b>                                     | BD biosciences    | 55/PKBa/Akt     | 8310873    | 560049      | 0,1      |
| <b>PE S6</b>                                      | Cell signalling   | 54D2            | 1          | 55594S      | 0,005    |
| <b>Alexa fluor 647 HOBIT (ZNF683)</b>             | BD biosciences    | sanquin-hobit/1 | 8201604    | 566250      | 0.06     |
| <b>PC5.5 Tbet</b>                                 | ebioscience       | P3.6.2.8.1      | 4289808    | 45-4714-80  | 0.06     |
| <b>PC7 EOMES</b>                                  | ebioscience       | WD1928          | 192396     | 25-4877-42  | 0.06     |
| <b>PE BLIMP1</b>                                  | BD biosciences    | 6D3             | 7290934    | 564702      | 0.02     |
| <b>Foxp3 transcription factor staining buffer</b> | fisher scientific |                 | 2075534    | 115-000-597 |          |
| <b>BV510 CD3</b>                                  | BD biosciences    | UCHT1           | 8297756    | 563109      | 0.06     |
| <b>Pacific blue TCR Vδ2</b>                       | Beckman coulter   | IMMU389         | 5          | B49310      | 0.04     |
| <b>FITC TCR Vδ2</b>                               | Beckman coulter   | IMMU389         | 2000040    | I1464       | 0.04     |

|                                    |                     |          |         |            |        |
|------------------------------------|---------------------|----------|---------|------------|--------|
| <b>FITC KLRG1</b>                  | ebioscience         | 13F13F2  | 4345831 | 53948842   | 0.4    |
| <b>PE CD69</b>                     | Beckman coulter     | TP1.55.3 | 41      | IM19930    | 0.1    |
| <b>Alexa fluor 700 CD69</b>        | BD biosciences      | FN50     | 7258876 | 560739     | 0.1    |
| <b>PE-CY5.5 Panδ</b>               | Beckman coulter     | IMMU510  | 30      | A99021     | 01:50  |
| <b>live viability e fluor 780</b>  | ebioscience         |          | 4302692 | 65-0865-13 | 0.0002 |
| <b>BD cytofix/cytoperm™</b>        | BD biosciences      |          |         | 555028     |        |
| <b>Protein transport inhibitor</b> | BD biosciences      |          | 9011506 | 554724     |        |
| <b>Phospho buffer perm III</b>     | BD biosciences      |          | 5260671 | 558050     |        |
| <b>Lyse/fix buffer 5X</b>          | BD biosciences      |          | 7180900 | 558049     |        |
| <b>Purified anti-CD3</b>           | Beckman coulter     | UCHT1    | 200036  | IM1304     |        |
| <b>Purified anti-Vδ1</b>           | produced in the lab |          |         |            |        |

## **Supplemental Figures**

### **Figure S1. Flow chart of the ancillary study**

Samples came from patients initially included in a French multicenter study (n=186) from which 83 were included at Bordeaux University Hospital. Among those 83 patients, 77 could be followed for more than 1 month, 44 were treated with mycophenolic acid (MPA-treated patients) and 33 were treated with everolimus (EVR-treated patients). Among EVR-treated patients, 6 have been switched to MPA and were excluded of analyses. Consequently, the analyses of the study included 44 MPA-treated patients and 27 EVR-treated patients.

### **Figure S2 Flow chart of MPA-treated patients of the ancillary study**

Among the 44 MPA-treated patients of the ancillary study, 33 had available frozen PBMC at day 0 of transplantation. 21 were used to constitute the first set of patients with total CD8 and  $\gamma\delta$  T cell phenotype, and 12 were used for the second set of patients with CD8, CMV-specific CD8 and  $\gamma\delta$  T cell phenotype.

### **Figure S3 $V\delta 2^{\text{neg}}$ $\gamma\delta$ T cells and CD8+ $\alpha\beta$ T cells phenotype at baseline in CMV seropositive patients**

A.  $V\delta 2^{\text{neg}}$   $\gamma\delta$  T cell and CD8+  $\alpha\beta$  T cell expression of CD27 and CD45RA analyzed by flow cytometry separating patients with no CMV DNAemia or CMV DNAemia requiring no treatment (well-controlled CMV, n=12) versus patients requiring CMV antiviral treatment (severe CMV, n=9).

B.  $V\delta 2^{\text{neg}}$   $\gamma\delta$  T cells and CD8+ T cells phenotypes for inhibitory receptors and KLRG1 expression were validated in an internal cohort of patients with well-controlled CMV (n=5) versus patients with severe CMV (n=7).

Each symbol represents an individual donor; large horizontal lines indicate the mean and small horizontal lines indicate the standard deviation,  $0.05 > p > 0.01^*$ ;  $**0.01 > p > 0.001$ ;  $***p < 0.001$ ; as determined by the Mann-Whitney U test.

**Figure S4 Phenotype of  $V\delta 2^{\text{neg}}$   $\gamma\delta$  T cells and CMV-specific  $\alpha\beta$  T cells during *in vitro* culture**

A. One representative phenotype at day 0 of CMV positive patient's PBMC used for *in vitro* IL2-IL15 culture of  $V\delta 2^{\text{neg}}$   $\gamma\delta$  T cells, analyzed by flow cytometry.

B. One representative proliferation assay of TEMRA  $V\delta 2^{\text{neg}}$   $\gamma\delta$  T cells analyzed by CFSE staining of CD45<sup>+</sup> CD27<sup>-</sup> cells by flow cytometry.

C. One representative phenotype at day 7, 14 and 21 of CMV positive patient's PBMC during *in vitro* culture of  $V\delta 2^{\text{neg}}$   $\gamma\delta$  T cells analyzed by flow cytometry.

D. Evolution of  $V\delta 2^{\text{neg}}$   $\gamma\delta$  T cell number during 21 days of PBMC cultures with IL2 (n=4) and IL2-IL15 (n=4), obtained by Neubauer counting associated with analysis of  $V\delta 2^{\text{neg}}$   $\gamma\delta$  T cells percentage by flow cytometry. Results are the mean  $\pm$  SD of the cell number fold increase from day 0, of PBMC cultures from those 4 different donors.

E. One representative phenotype at day 0 of CMV positive patient's PBMC used for *in vitro* culture of CMV-specific  $\alpha\beta$  T cells analyzed by flow cytometry.

**Figure S5 Low dose of mTORi decrease the number of  $V\delta 2^{\text{neg}}$   $\gamma\delta$  T cells and CMV-specific  $\alpha\beta$  T cell expressing CD85j.**

Expression of CD85j was analyzed in  $V\delta 2^{\text{neg}}$   $\gamma\delta$  T cells and CMV specific  $\alpha\beta$  T cells by flow cytometry after culturing PBMC of CMV seropositive donors (one representative, Figure A; cumulative results for 5 donors, Figure B) *in vitro* with or without a low dose (0.5nM) of everolimus during 21 days for the culture of  $V\delta 2^{\text{neg}}$   $\gamma\delta$  T cells and during 16 days for the culture

of CMV specific  $\alpha\beta$  T cells (stimulated overnight by pp65 peptides and gated on non- $\gamma\delta$  T cells positive for CD69 and IFN $\gamma$ ). Each symbol represents an individual donor;  $0.05 > p > 0.01^*$ ;  $**0.01 > p > 0.001$ ; as determined by Wilcoxon test.

**Figure S6 mTORi does not affect CMV-specific  $\alpha\beta$  T cell frequencies during in vitro culture**

One representative phenotype of CMV-specific  $\alpha\beta$  T cells after 7 days of PBMC culture with IL2 with or without 0.5nM everolimus. After overnight stimulation with CMV peptides, CMV-specific  $\alpha\beta$  T cells were gated by flow cytometry through their expression of CD69 and IFN $\gamma$  among non  $\gamma\delta$  T cells (left). Cumulative results for 5 donors(right).

**Figure S7 mTORi improvement of the T cell dysfunctional profile is maintained when combined with ciclosporin**

(A)  $V\delta 2^{neg}$   $\gamma\delta$  T cells (after 7, 14 and 21 days for expansion and 21 days for PD1 and CD85j expression) and (B) CMV-specific  $\alpha\beta$  T cells (after 16 days) with 0/25/75/200mg/mL<sup>-1</sup> with either medium, 0.5nM everolimus or mycophenolate mofetil (MMF) were analyzed after *in vitro* culture of PBMC from CMV-seropositive KTR. Expansion are expressed as fold increase from day 0 of culture. PD-1 and CD85j are expressed as proportion among total  $V\delta 2^{neg}$   $\gamma\delta$  T cells or CMV-specific  $\alpha\beta$  T cells.

Each symbol represents an individual donor. ns, not significant,  $0.05 > p > 0.01^*$ ;  $**0.01 > p > 0.001$ ; as determined by Wilcoxon test.

**Figure S8 Blocking anti-CD3 mAb had no effect on  $V\delta 2^{neg}$   $\gamma\delta$  T cell viability.**

V $\delta$ 2<sup>neg</sup>  $\gamma\delta$  T cells were negatively sorted after 21 days of culture with 0 or 0.5 nM everolimus and were cultured in the same medium alone (either with 0 or 0.5 nM everolimus), with non-infected (NI), or with CMV-infected (CMV) fibroblasts with or without blocking anti-CD3 mAb (10 $\mu$ g/ml) during 24 hours and cells were stained with 1 $\mu$ M DAPI (4',6-Diamidino-2-Phenylindole, Dihydrochloride) to assess their viability by flow cytometry.

**Figure S9 mTORi does not affect SLP-76 and MAP kinase 38 signaling after TCR stimulation of V $\delta$ 2<sup>neg</sup>  $\gamma\delta$  T cells**

V $\delta$ 2<sup>neg</sup>  $\gamma\delta$  T cells were negatively sorted after 21 days of culture with 0 or 0.5 nM of everolimus, and stimulated with an agonist anti-CD3 mAb (UCHT1, 10 $\mu$ g/ml) for the indicated durations. SLP-76 phosphorylation (A) and MAP kinase 38 phosphorylation (B) were measured by flow cytometry in 4 donors (right, mean  $\pm$  ranges) and in a representative donor (left).

**Figure S10 No effect of mTORi on Akt phosphorylation after TCR stimulation of V $\delta$ 2<sup>neg</sup>  $\gamma\delta$  T cells**

After 21 days of culture with 0 or 0.5 nM of everolimus, PBMC were stimulated using an agonist anti-V $\delta$ 1 mAb (10 $\mu$ g/ml) for 30 minutes, 2 and 4 hours and Akt phosphorylation was measured and analyzed by flow cytometry (T308 phosphorylation site, left; S473 phosphorylation site, right) for 4 donors (mean  $\pm$  ranges).



Figure S1

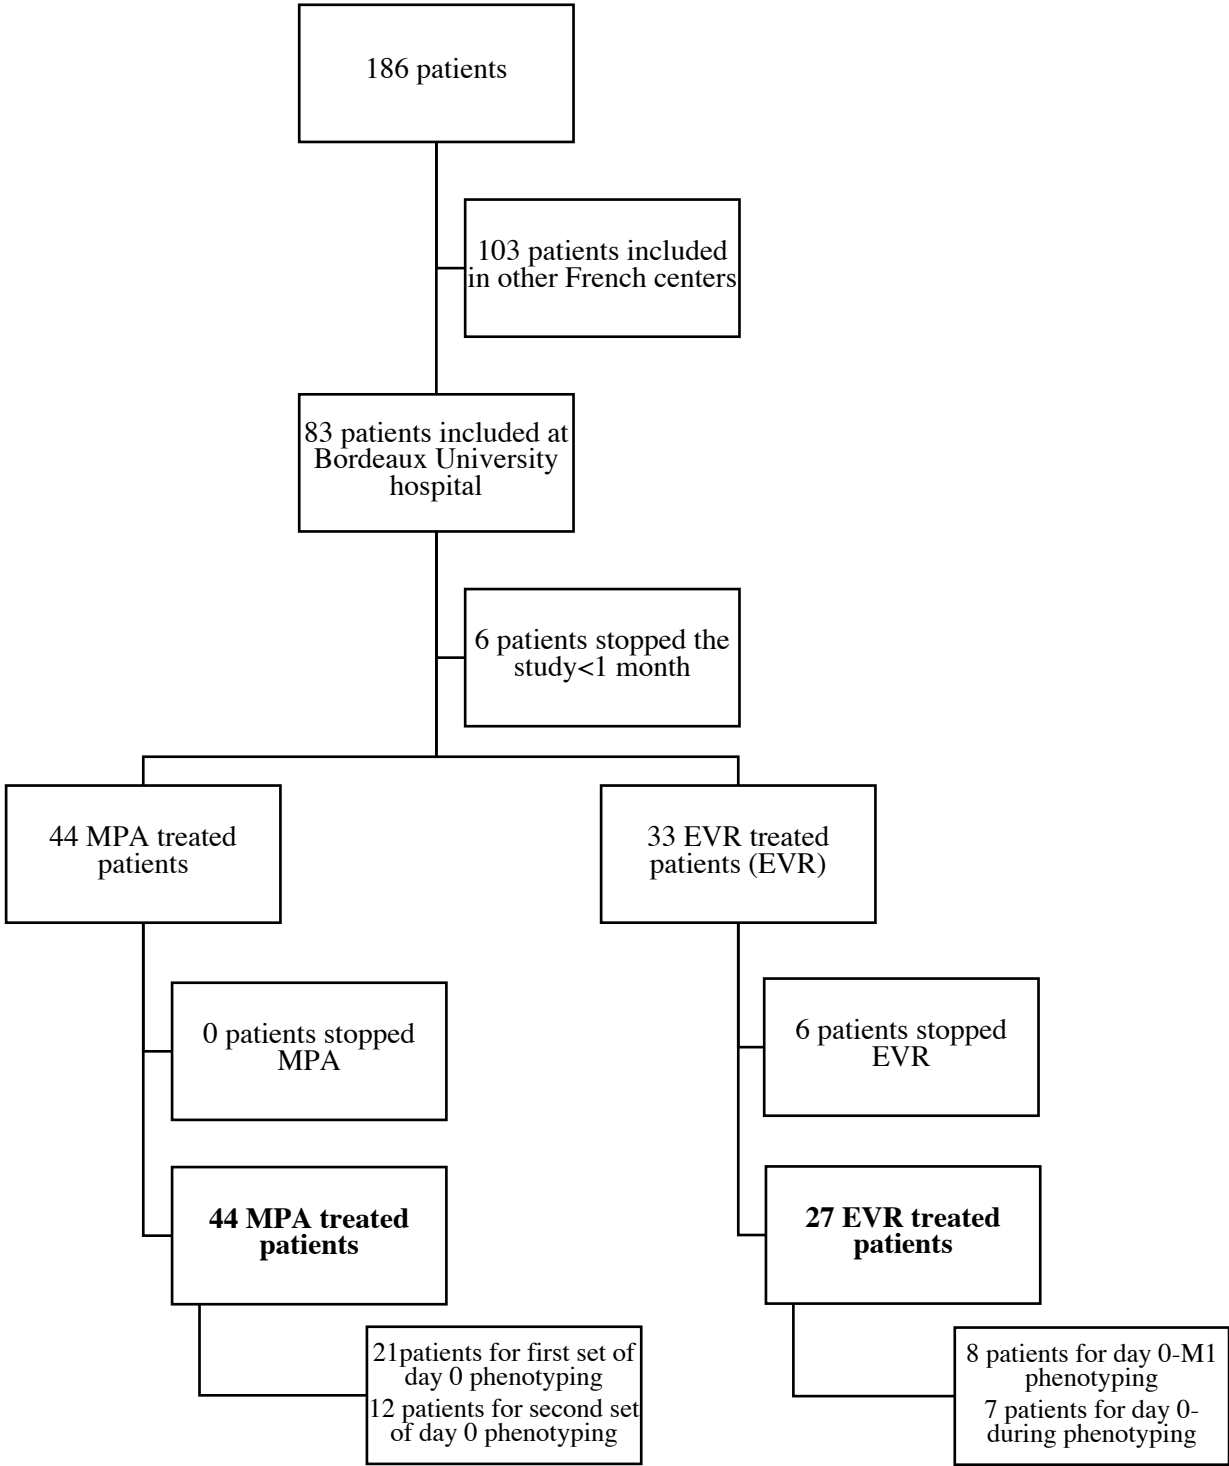

**Supplemental Figure 1. Flow chart of the ancillary study**

Samples came from patients initially included in a French multicenter study (n=186) from which 83 were included at Bordeaux University Hospital. Among those 83 patients, 77 could be followed for more than 1 month, 44 were treated with mycophenolic acid (MPA-treated patients) and 33 were treated with everolimus (EVR-treated patients). Among EVR-treated patients, 6 have been switched to MPA and were excluded of analyses. Consequently, the analyses of the study included 44 MPA-treated patients and 27 EVR-treated patients.

Figure S2

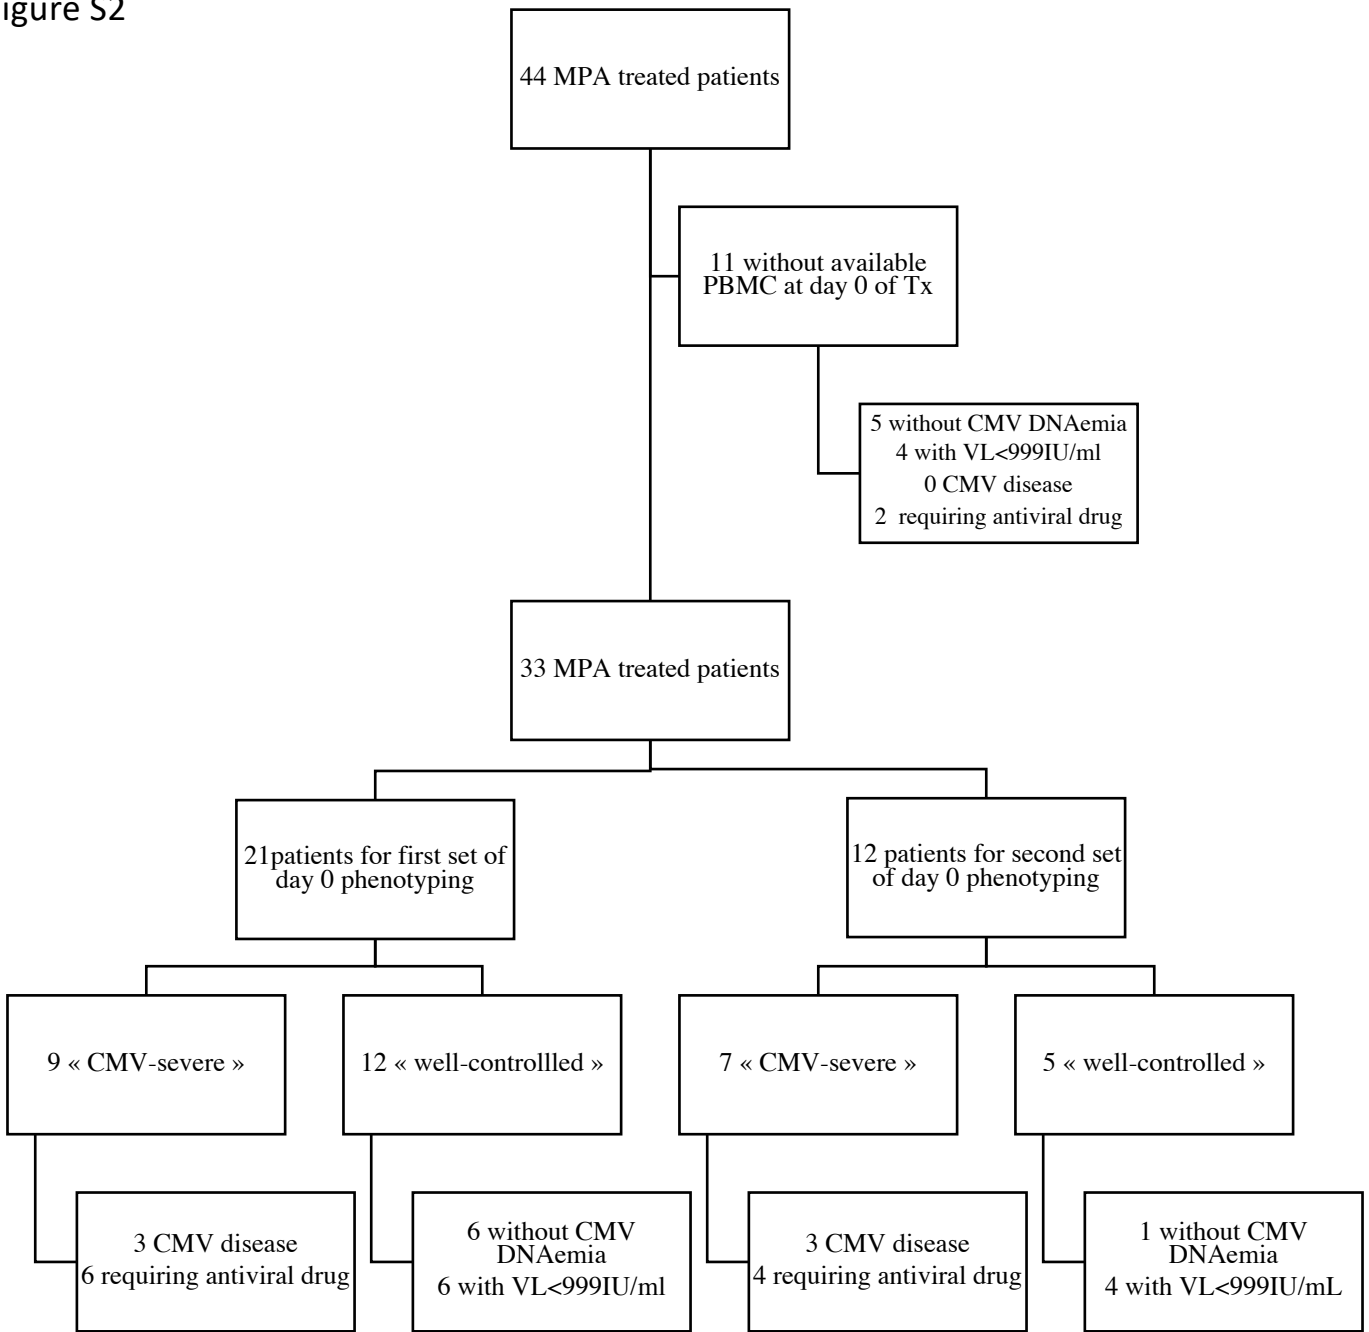

**Supplemental Figure 2. Flow chart of MPA-treated patients of the ancillary study**

Among the 44 MPA-treated patients of the ancillary study, 33 had available frozen PBMC at day 0 of transplantation. 21 were used to constitute the first set of patients with total CD8 and  $\gamma\delta$  T cell phenotype, and 12 were used for the second set of patients with CD8, CMV-specific CD8 and  $\gamma\delta$  T cell phenotype. VL:viral load

Figure S3

A

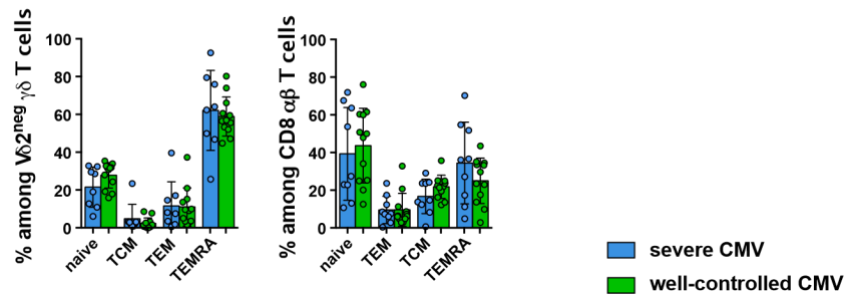

B

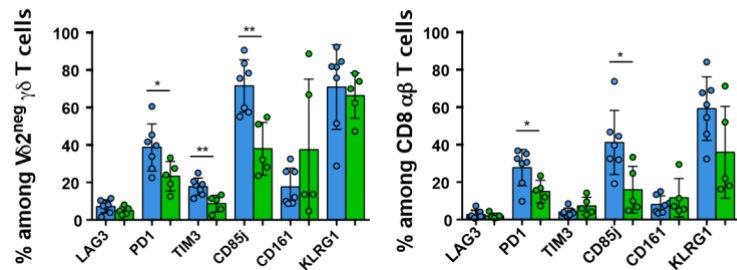

**Figure S3:  $V\delta 2^{\text{neg}}$   $\gamma\delta$  T cells and  $CD8^+$   $\alpha\beta$  T cells phenotype at baseline in CMV seropositive patients**

A.  $V\delta 2^{\text{neg}}$   $\gamma\delta$  T cell and  $CD8^+$   $\alpha\beta$  T cell expression of CD27 and CD45RA analyzed by flow cytometry separating patients with no CMV DNAemia or CMV DNAemia requiring no treatment (well-controlled CMV, n=12) versus patients requiring CMV antiviral treatment (severe CMV, n=9).

B.  $V\delta 2^{\text{neg}}$   $\gamma\delta$  T cells and  $CD8^+$  T cells phenotypes for inhibitory receptors and KLRG1 expression were validated in an internal cohort of patients with well-controlled CMV (n=5) versus patients with severe CMV (n=7).

Each symbol represents an individual donor; large horizontal lines indicate the mean and small horizontal lines indicate the standard deviation,  $0.05 > p > 0.01^*$ ;  $0.01 > p > 0.001^{**}$ ;  $p < 0.001^{***}$ ; as determined by the Mann-Whitney U test.

Figure S4

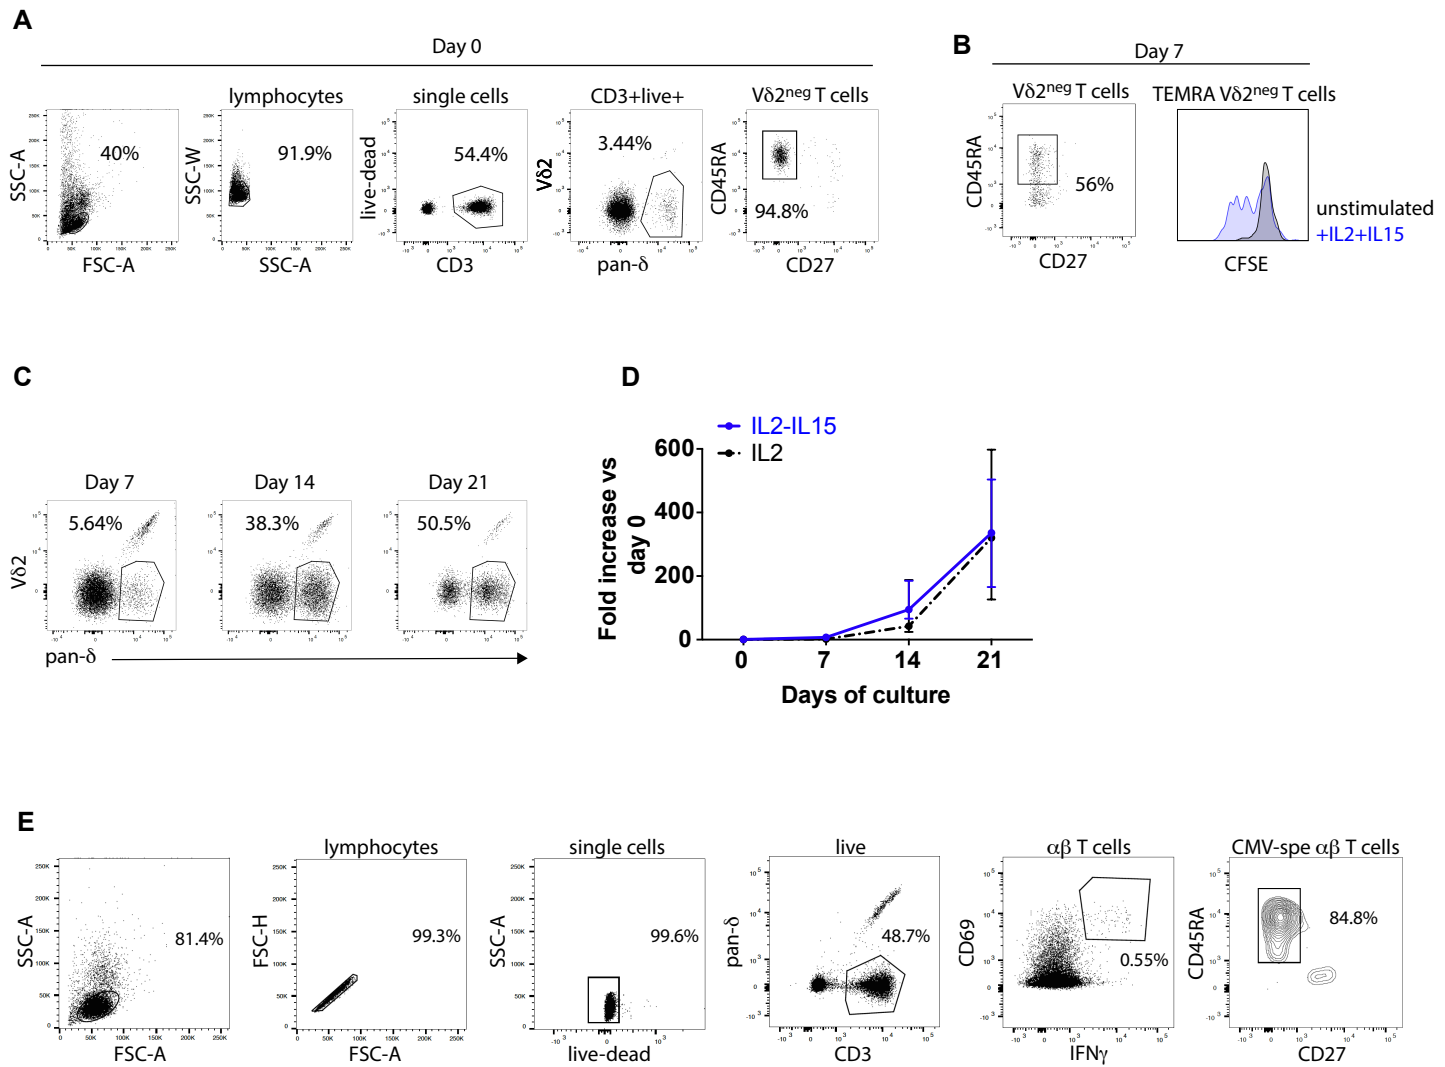

**Figure S4: Phenotype of Vδ2<sup>neg</sup> γδ T cells and CMV-specific αβ T cells during in vitro culture**

A. One representative phenotype at day 0 of CMV positive patient's PBMC used for *in vitro* IL2-IL15 culture of Vδ2<sup>neg</sup> γδ T cells, analyzed by flow cytometry. B. One representative proliferation assay of TEMRA Vδ2<sup>neg</sup> γδ T cells analyzed by CFSE staining of CD45<sup>+</sup> CD27<sup>-</sup> cells by flow cytometry. C. One representative phenotype at day 7, 14 and 21 of CMV positive patient's PBMC during *in vitro* culture of Vδ2<sup>neg</sup> γδ T cells analyzed by flow cytometry. D. Evolution of Vδ2<sup>neg</sup> γδ T cell number during 21 days of PBMC cultures with IL2 (n=4) and IL2-IL15 (n=4), obtained by Neubauer counting associated with analysis of Vδ2<sup>neg</sup> γδ T cells percentage by flow cytometry. Results are the mean  $\pm$  SD of the cell number fold increase from day 0, of PBMC cultures from those 4 different donors. E. One representative phenotype at day 0 of CMV positive patient's PBMC used for *in vitro* culture of CMV-specific αβ T cells analyzed by flow cytometry.

A

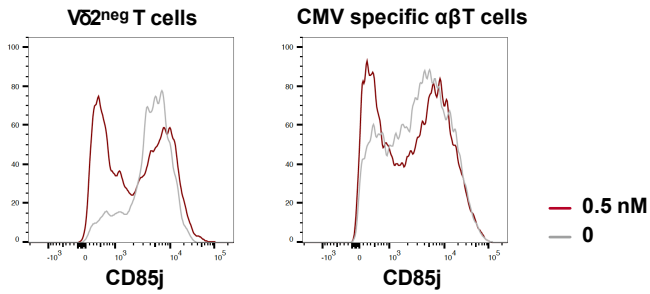

B

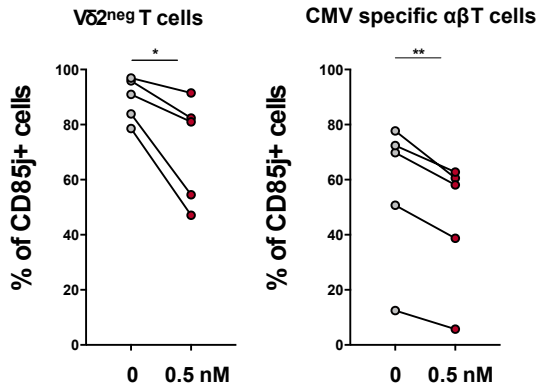

**Figure S5: Low dose of mTORi decrease the number of Vδ2<sup>neg</sup> γδ T cells and CMV-specific αβ T cell expressing CD85j.**

Expression of CD85j was analyzed in Vδ2<sup>neg</sup> γδ T cells and CMV specific αβ T cells by flow cytometry after culturing PBMC of CMV seropositive donors (one representative, Figure A; cumulative results for 5 donors, Figure B) *in vitro* with or without a low dose (0.5nM) of everolimus during 21 days for the culture of Vδ2<sup>neg</sup> γδ T cells and during 16 days for the culture of CMV specific αβ T cells (stimulated overnight by pp65 peptides and gated on non-γδ T cells positive for CD69 and IFNγ). Each symbol represents an individual donor; 0.05 > p > 0.01\*; \*\*0.01 > p > 0.001; as determined by Wilcoxon test.

Figure S6

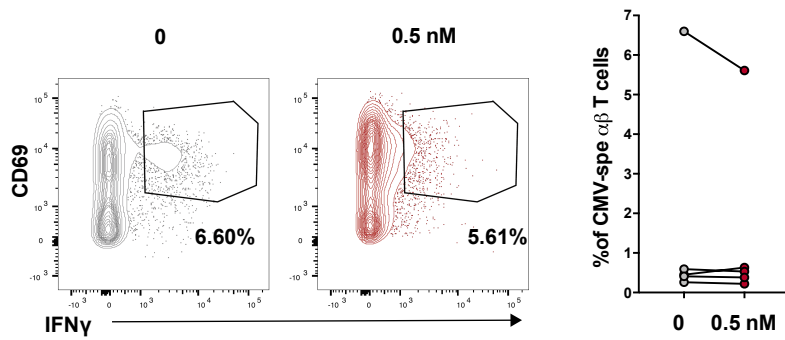

**Figure S6: mTORi does not affect CMV-specific  $\alpha\beta$  T cell frequencies during in vitro culture**

One representative phenotype of CMV-specific  $\alpha\beta$  T cells after 7 days of PBMC culture with IL2 with or without 0.5nM everolimus. After overnight stimulation with CMV peptides, CMV-specific  $\alpha\beta$  T cells were gated by flow cytometry through their expression of CD69 and IFN $\gamma$  among non  $\gamma\delta$  T cells (left). Cumulative results for 5 donors(right).

Figure S7

**A**  $V\delta 2^{neg} \gamma\delta$  T cells

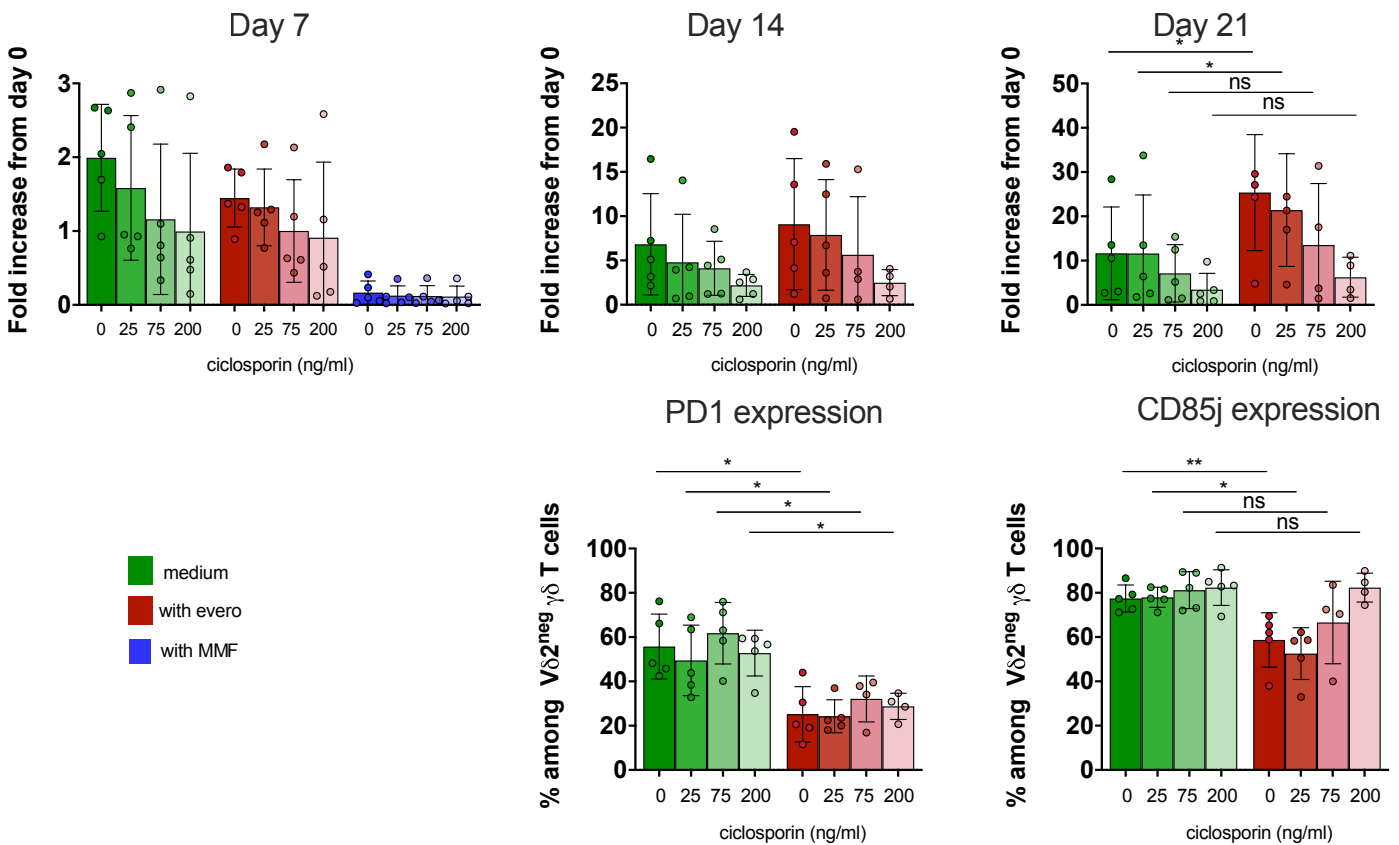

**B** CMV-specific  $\alpha\beta$  T cells

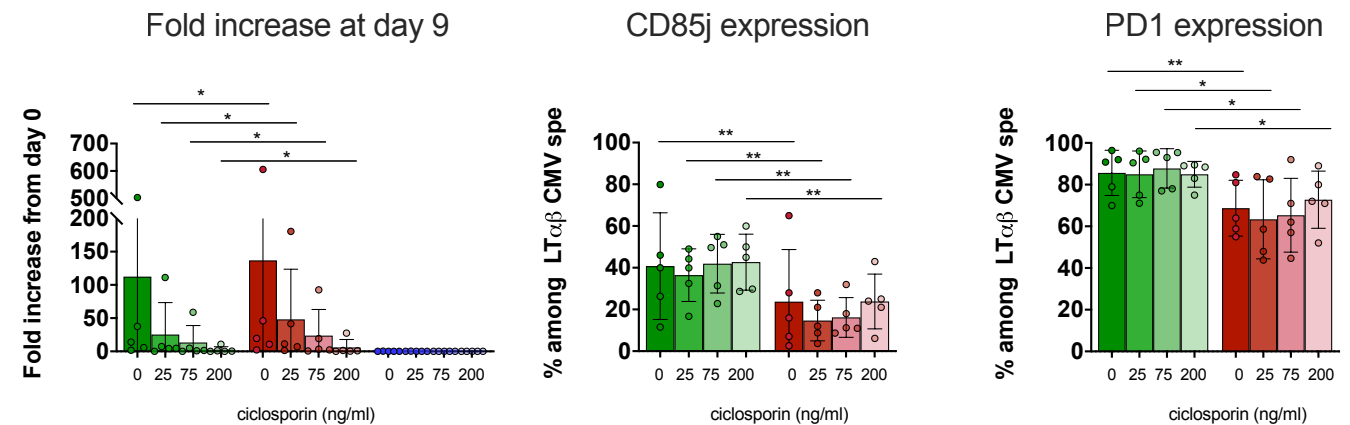

**Figure S7: mTORi improvement of the T cell dysfunctional profile is maintained when combined with ciclosporin**

(A)  $V\delta 2^{neg} \gamma\delta$  T cells (after 7, 14 and 21 days for expansion and 21 days for PD1 and CD85j expression) and (B) CMV-specific  $\alpha\beta$  T cells (after 16 days) with 0/25/75/200mg/mL<sup>-1</sup> with either medium, 0.5nM everolimus or mycophenolate mofetil (MMF, 1000ng.mL<sup>-1</sup>) were analyzed after *in vitro* culture of PBMC from CMV-seropositive kidney transplant recipients. Expansion are expressed as fold increase from day 0 of culture. PD-1 and CD85j are expressed as proportion among total  $V\delta 2^{neg} \gamma\delta$  T cells or CMV-specific  $\alpha\beta$  T cells. Each symbol represents an individual donor. ns, not significant, 0.05>p>0.01\*; \*\*0.01>p>0.001; as determined by Wilcoxon test.

Figure S8

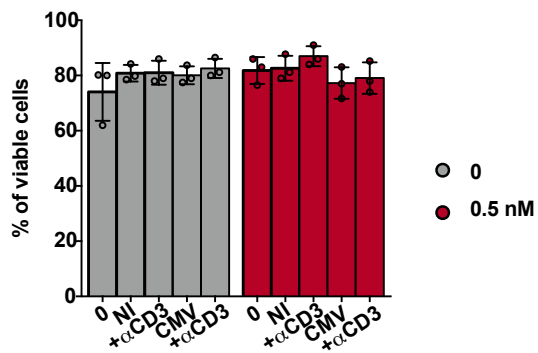

**Figure S8: Blocking anti-CD3 mAb had no effect on Vδ2<sup>neg</sup> γδ T cell viability.**

Vδ2<sup>neg</sup> γδ T cells were negatively sorted after 21 days of culture with 0 or 0.5 nM everolimus and were cultured in the same medium alone (either with 0 or 0.5 nM everolimus), with non-infected (NI), or with CMV-infected (CMV) fibroblasts with or without blocking anti-CD3 mAb (10 μg/ml) during 24 hours and cells were stained with 1 μM DAPI (4',6-Diamidino-2-Phenylindole, Dihydrochloride) to assess their viability by flow cytometry.



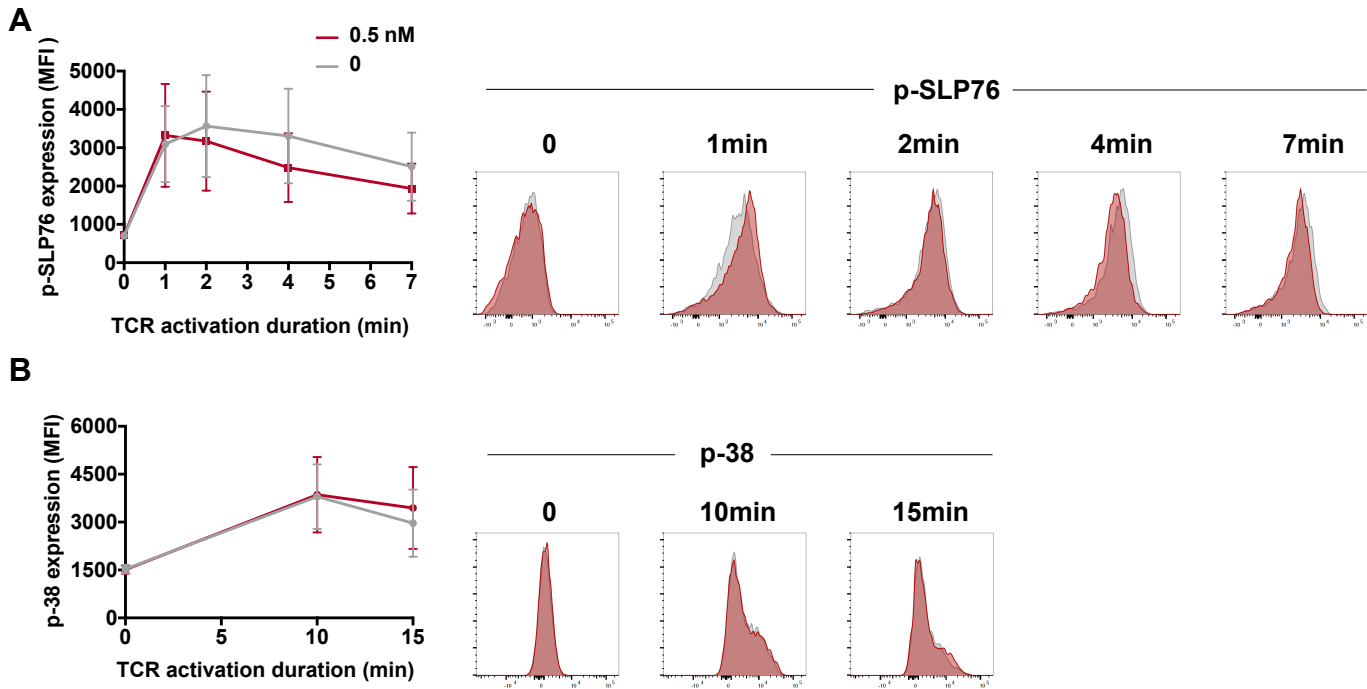

**Figure S9: mTORi does not affect SLP-76 and MAP kinase 38 signaling after TCR stimulation of  $V\delta 2^{\text{neg}}$   $\gamma\delta$  T cells**

$V\delta 2^{\text{neg}}$   $\gamma\delta$  T cells were negatively sorted after 21 days of culture with 0 or 0.5 nM of everolimus, and stimulated with an agonist anti-CD3 mAb (UCHT1, 10 $\mu$ g/ml) for the indicated durations. SLP-76 phosphorylation (A) and MAP kinase 38 phosphorylation (B) were measured by flow cytometry in 4 donors (right, mean  $\pm$  ranges) and in a representative donor (left).

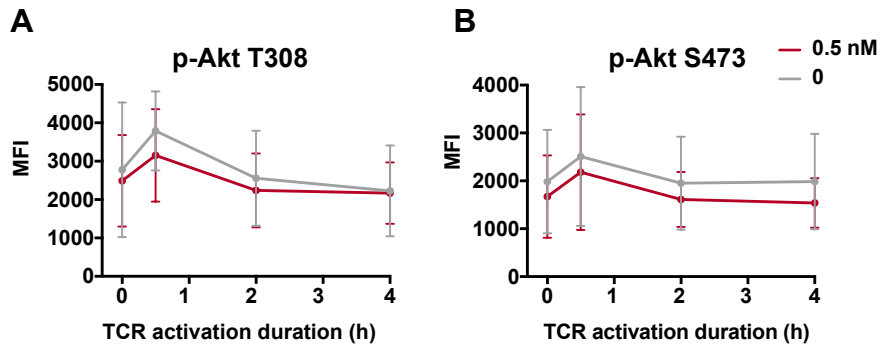

**Figure S10: No effect of mTORi on Akt phosphorylation after TCR stimulation of  $V\delta 2^{\text{neg}}$   $\gamma\delta$  T cells**

After 21 days of culture with 0 or 0.5 nM of everolimus, PBMC were stimulated using an agonist anti- $V\delta 1$  mAb ( $10\mu\text{g/ml}$ ) for 30 minutes, 2 and 4 hours and Akt phosphorylation was measured and analyzed by flow cytometry (T308 phosphorylation site, left; S473 phosphorylation site, right) for 4 donors (mean  $\pm$  ranges).
